# Supplementary material for: Regulatory Mechanism of Humulinone on Protein Foam: applications in whey and pea protein
Source: Research Square preprint supplement (doi:10.21203/rs.3.rs-6811741/v1), 2025-06-17
Supplement: Supplementary file 1 [file 7bcb46203688f0ec9b74088d.docx]

**Supplemental Materials**

**Regulatory Mechanism of Humulinone on Protein Foam: applications in whey and pea protein**

Yang Gao, Chen Xu, Hanhan Liu, Junyu Lin, Chenyan Lv*

College of Food Science & Nutritional Engineering, China Agricultural University, Beijing Key Laboratory of Functional Food from Plant Resources, Beijing 100083, China.

*Corresponding author: Chenyan Lv, College of Food Science and Nutritional Engineering, China Agricultural University, Beijing 100083, China, E-mail: 2019023@cau.edu.cn.

**A**

RSDPQNPFIFKSNKFQTLFENENGHIRLLQKFDQRSKIFENLQNYRLLEYKSKPHTIFLPQHTDADYILVVLSGKAILTVLKPDDRNSFNLERGDTIKLPAGTIAYLVNRDDNEELRVLDLAIPVNRPGQLQSFLLSGNQNQQNYLSGFSKNILEASFNTDYEEIEKVLLEEHEKETQHRRSLKDKRQQSQEENVIVKLSRGQIEELSKNAKSTSKKSVSSESEPFNLRSRGPIYSNEFGKFFEITPEKNPQLQDLDIFVNSVEIKEGSLLLPHYNSRAIVIVTVNEGKGDFELVGQRNENQQEQRKEDDEEEEQGEEEINKQVQNYKAKLSSGDVFVIPAGHPVAVKASSNLDLLGFGINAENNQRNFLAGDEDNVISQIQRPVKELAFPGSAQEVDRILENQKQSHFADAQPQQRERGSRETRDRLSSV

**B**

LREQPQQNECQLERLDALEPDNRIESEGGLIETWNPNNKQFRCAGVALSRATLQRNALRRPYYSNAPQEIFIQQGNGYFGMVFPGCPETFEEPQESEQGEGRRYRDRHQKVNRFREGDIIAVPTGIVFWMYNDQDTPVIAVSLTDIRSSNNQLDQMPRRFYLAGNHEQEFLQYQHQQGGKQEQENEGNNIFSGFKRDYLEDAFNVNRHIVDRLQGRNEDEEKGAIVKVKGGLSIISPPEKQARHQRGSRQEEDEDEEKQPRHQRGSRQEEEEDEDEERQPRHQRRRGEEEEEDKKERGGSQKGKSRRQGDNGLEETVCTAKLRLNIGPSSSPDIYNPEAGRIKTVTSLDLPVLRWLKLSAEHGSLHKNAMFVPHYNLNANSIIYALKGRARLQVVNCNGNTVFDGELEAGRALTVPQNYAVAAKSLSDRFSYVAFKTNDRAGIARLAGTSSVINNLPLDVVAATFNLQRNEARQLKSNNPFKFLVPARESENRASA

**Fig. S1** Amino acid sequences of 7S vicilin (A) and 11S legumin (B).


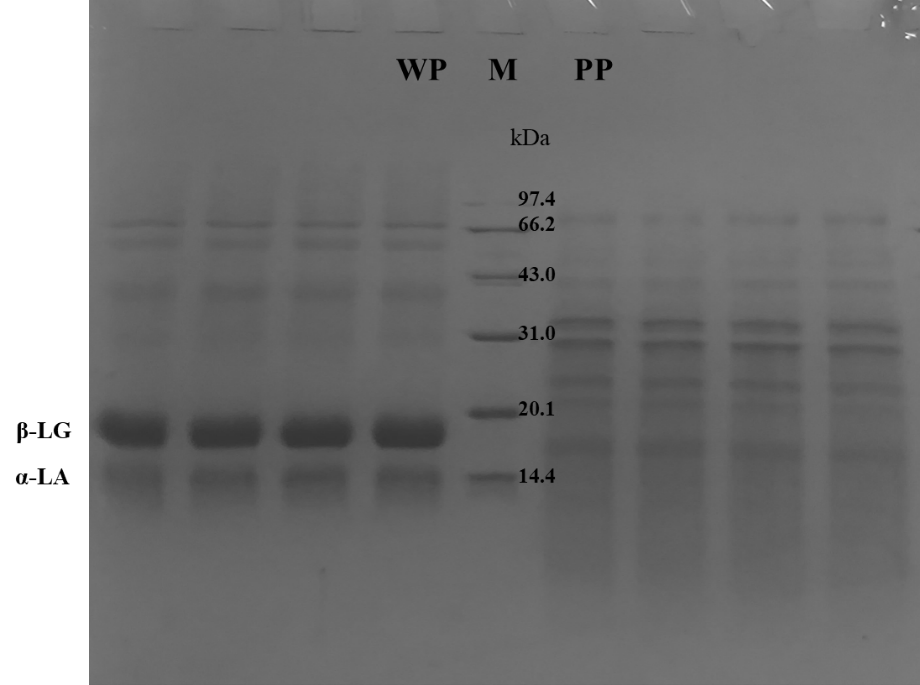


**Fig. S2** SDS-PAGE analyses of WP and PP (M: SDS marker).


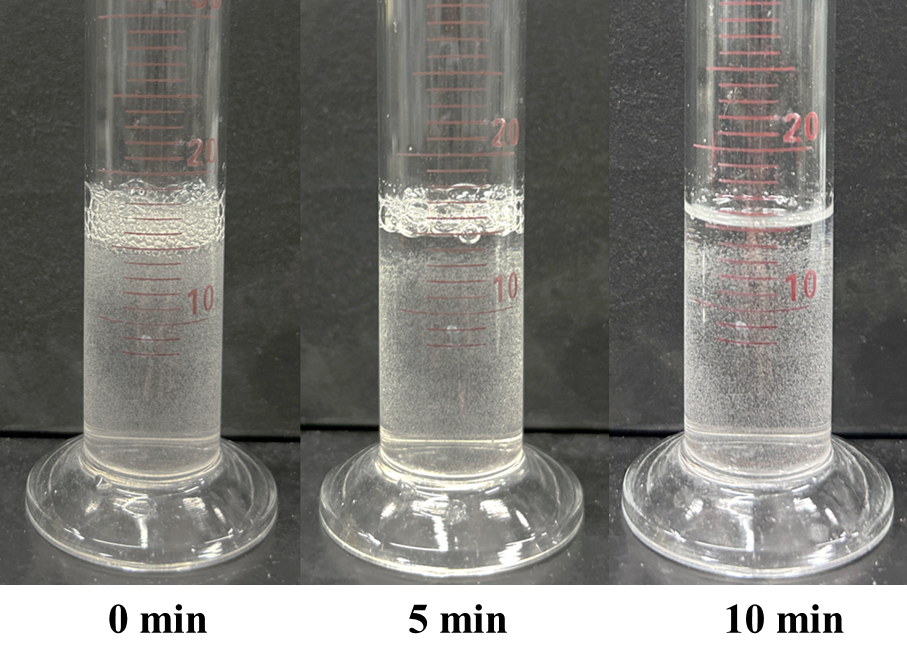


**Fig. S3** Change of humulinone solution (500 μM) after being whipped.


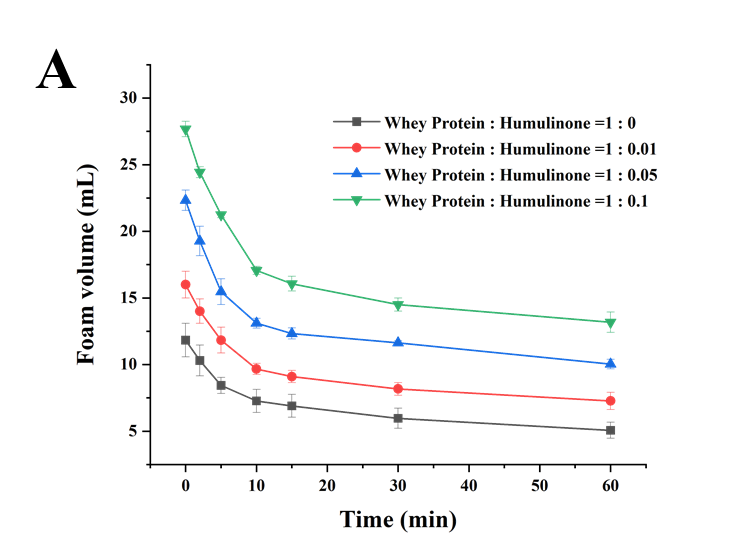

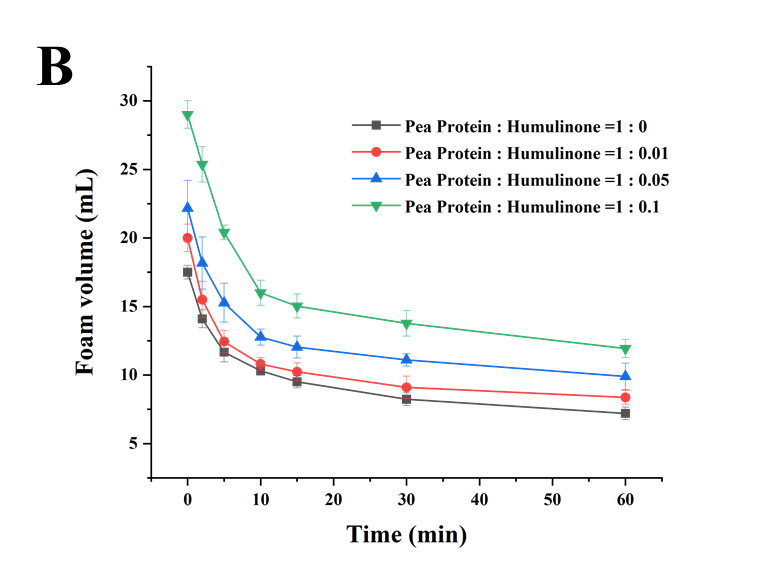


**Fig. S4** The foam volume of WP-humulinone (A) and PP-humulinone (B) solution with different molar ratio changes with time.


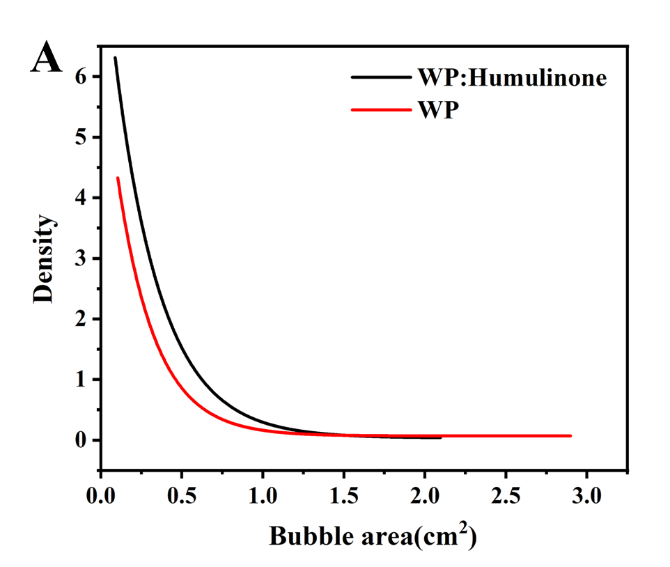

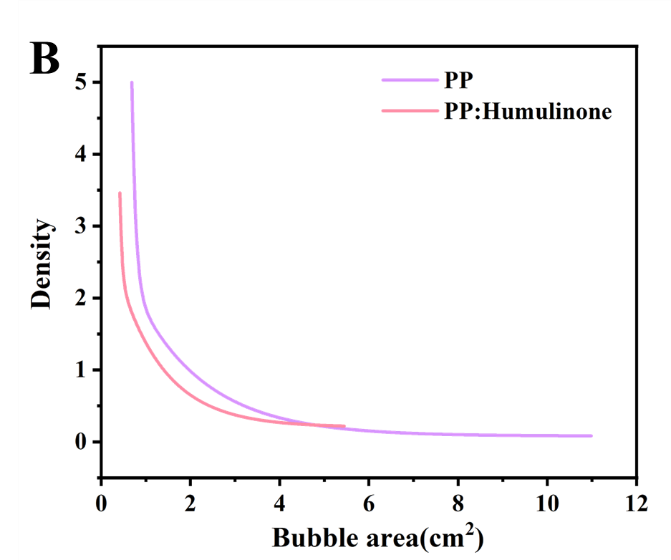


**Fig. S5** Size density of foam formed by PP/WP and PP/WP-humulinone (w: w = 1:0.1).


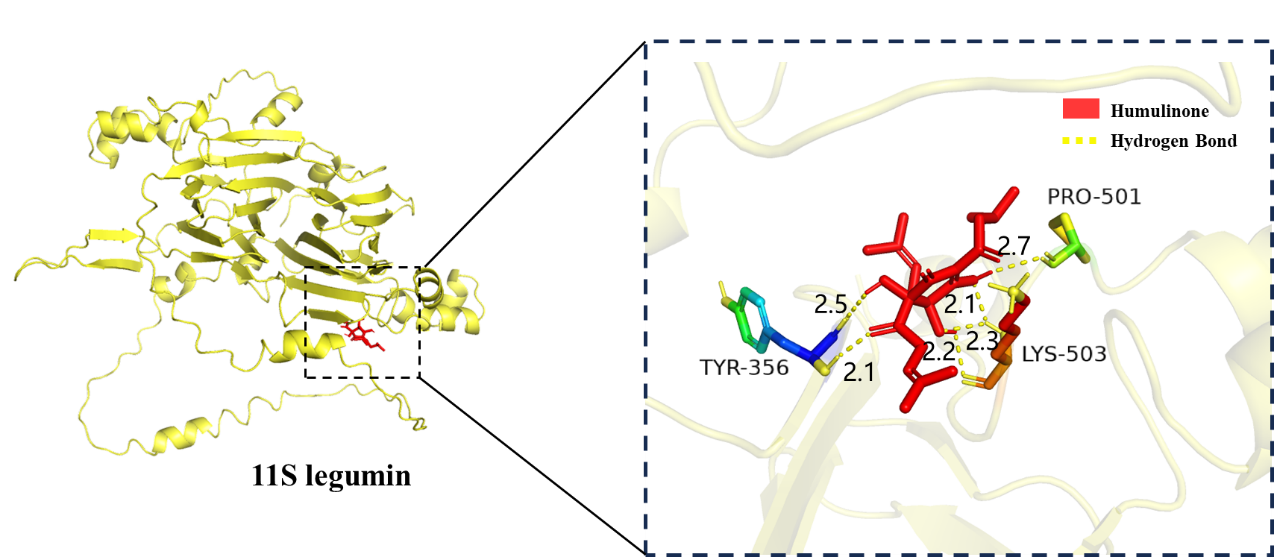


**Fig. S6** 3D view of the possible presence of binding sites for 11S legumin interacting with humulinone by hydrogen bonding.


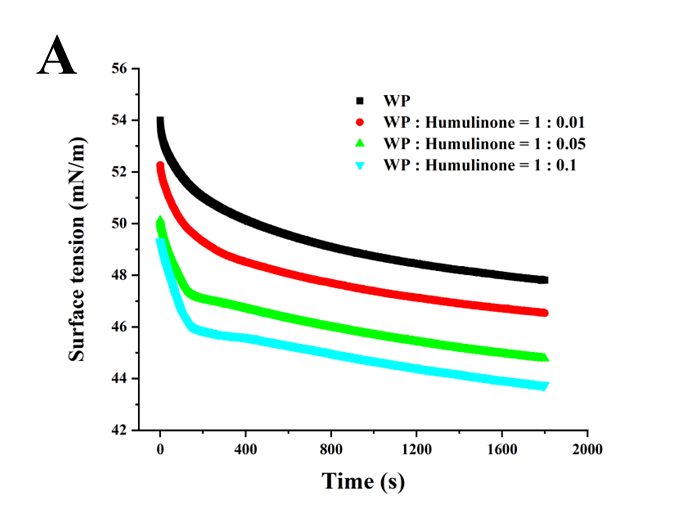

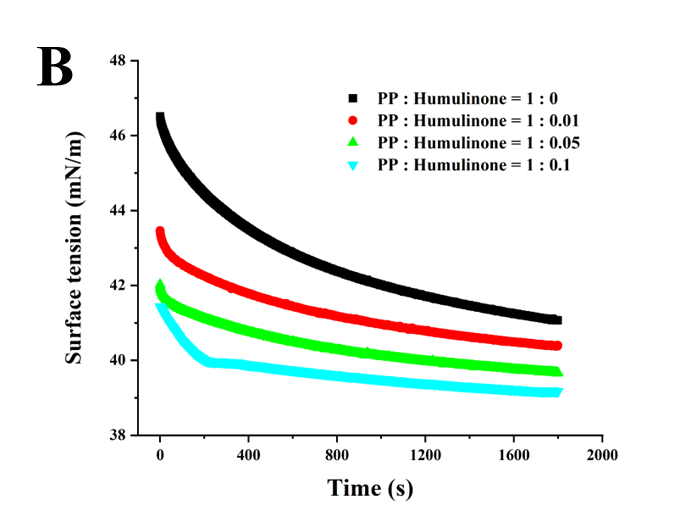


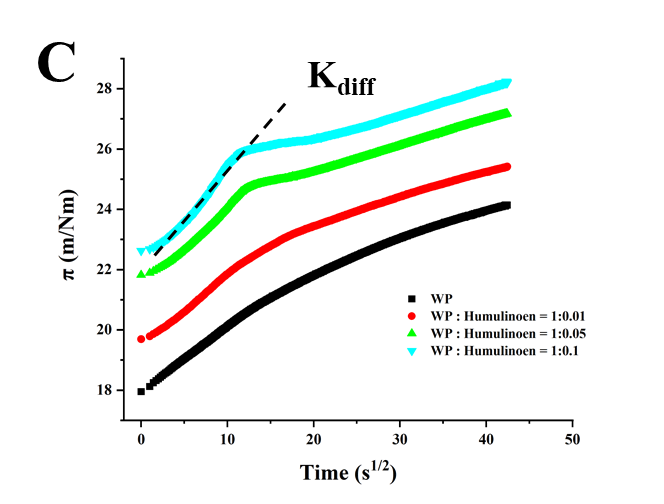

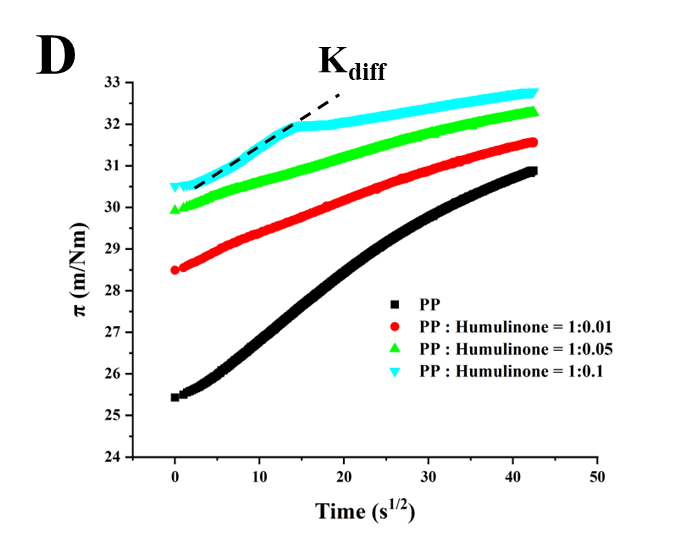


**Fig. S7** The dynamic surface tension of WP and WP-humulinone solution (A), PP and PP-humulinone solution (B) at the air/water interface during 1800 s Time dependence of surface pressure (π) for WP and WP-humulinone (C), PP and PP-humulinone (D) adsorbed films at the air/water interface.


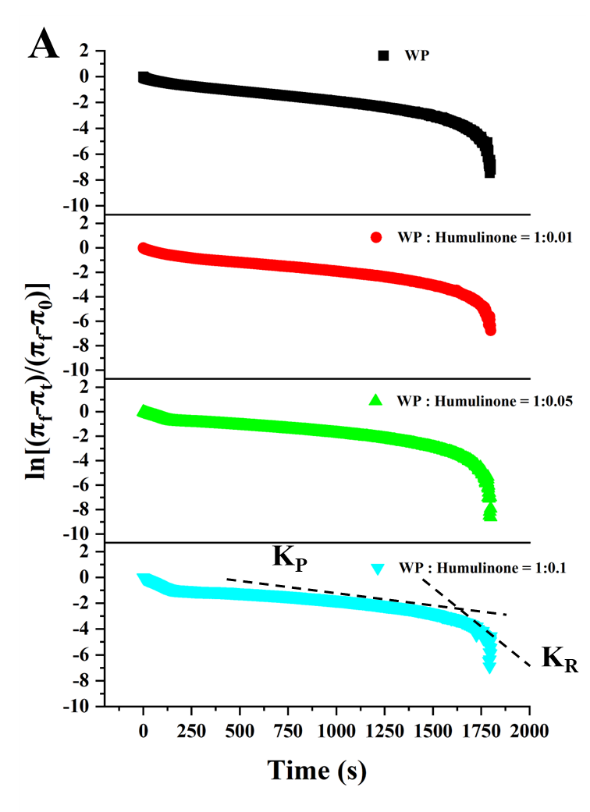

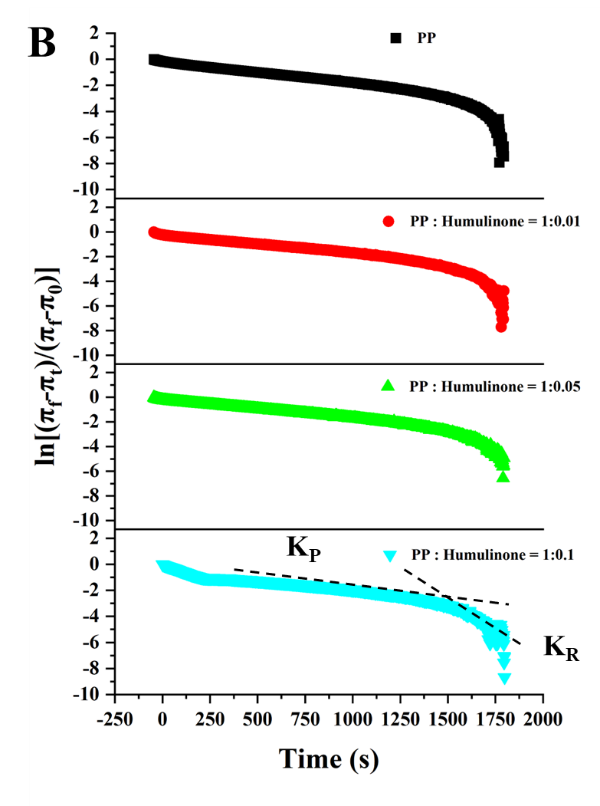


**Fig. S8** Typical profile of the molecular penetration and configurational rearrangement steps at the air/ water interface for WP and WP-humulinone (A), PP and PP-humulinone (B).
